# Supplementary material for: “Extra stabilisation” of a pyrene based molecular couple by γ-cyclodextrin in the excited electronic state
Source: Royal Society of Chemistry journal article supplement (doi:10.1039/c2cp41921a), 2012-01-01
Supplement: c2cp41921a.pdf [file c2cp41921a.pdf]

# “Extra stabilization” of pyrene based molecular couple by $\gamma$ -cyclodextrin in excited electronic state

Prasun Ghosh, Soumik Mandal, Tarasankar Das, Arnab maity, Parna Gupta\* and Pradipta Purkayastha\*

Department of Chemical Sciences, Indian Institute of Science Education and Research, Kolkata, Mohanpur Campus, Mohanpur 741252, WB, India.

## Method of calculation of binding constants from the Job's plots:

One type of complexation between guest and host has been observed in  $\gamma$ -CD. For 1:1 guest-host complex:  $G + H \rightleftharpoons [G-H]$ , G and H denote guest and host, respectively.

The equilibrium constant ( $K_d$ ) is given by,

$$K_d = \frac{[G-H]}{[G][H]} = \frac{\text{Absorbance of complex}}{(\text{Absorbance of free G})[CD]_{\text{at the intersecting point}}}$$

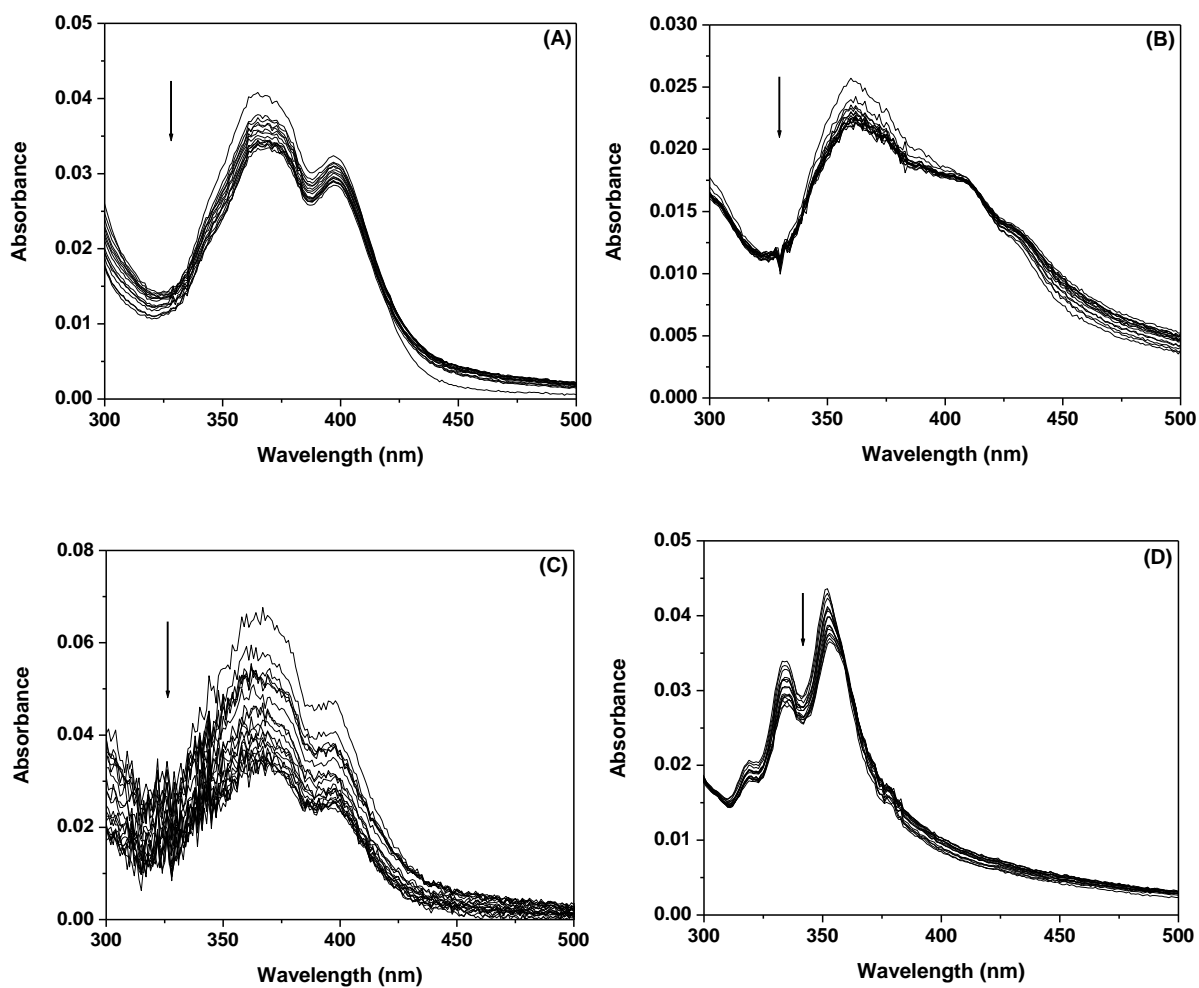

**Fig. S1.** Absorption spectra of (A) **1**, (B) **2**, (C) **3** and (D) **4** in presence of  $\gamma$ -CD. The arrows indicate decrease in absorbance at 360 nm with increase in concentration of  $\gamma$ -CD. Absorbance values at this wavelength have been used in the Job's method to calculate the stoichiometry and binding constants.

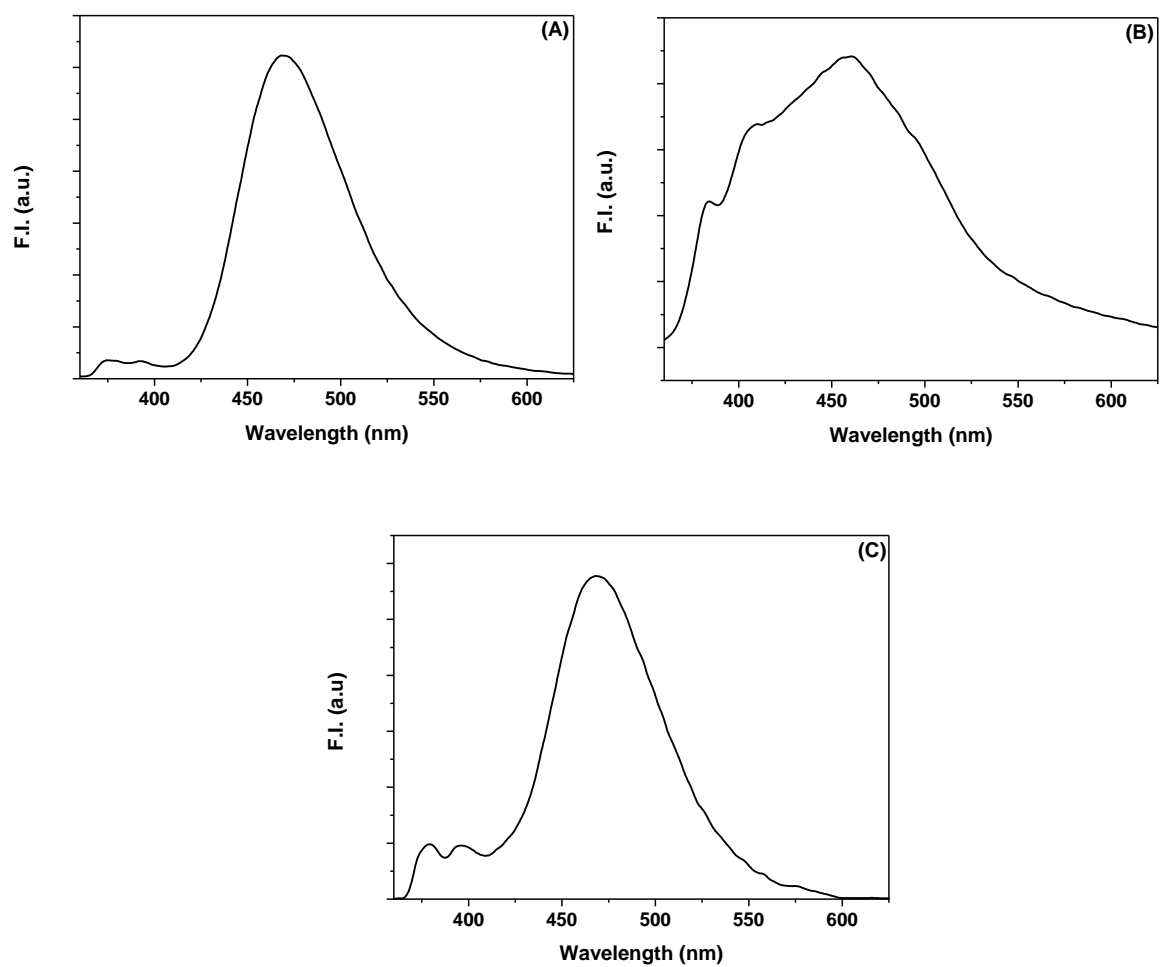

**Fig. S2.** Fluorescence spectra of (A) **1**, (B) **2** and (C) **3**. The excitation wavelength is 335 nm.
